# Supplementary material for: Among Live and Dead Bacteria, the Optimization of Sample Collection and Processing Remains Essential in Recovering Gut Microbiota Components
Source: PubMed Central journal article supplement (PMC6635563; doi:10.3389/fmicb.2019.01606), 2019-07-10
Supplement: Table_1.pdf [file Table_1.pdf]

## Supplementary Data

**Supplementary Table 1.** Main characteristics of healthy donors used in this study.

| Donor | Sex    | Origin   | Age (years) | Body Mass Index<br>BMI (Kg/m <sup>2</sup> ) |
|-------|--------|----------|-------------|---------------------------------------------|
| 1     | Female | France   | 28          | 22.03                                       |
| 2     | Male   | Senegal  | 32          | 22.22                                       |
| 3     | Male   | Senegal  | 32          | 22.44                                       |
| 4     | Female | Benin    | 26          | 17.95                                       |
| 5     | Male   | Cameroon | 32          | 29.64                                       |
| 6     | Male   | France   | 30          | 23.59                                       |
| 7     | Female | Algeria  | 27          | 25.71                                       |
| 8     | Male   | Algeria  | 27          | 25.88                                       |

**Supplementary Table 2.** Composition (g/L) of the protectant medium patented under the following number (N°1H53316 CAS 25 FR).

| Concentration per 1 liter of<br>medium (pH 7,3 ± 0,2) |          | References                                     |
|-------------------------------------------------------|----------|------------------------------------------------|
| PBS                                                   | 1L       | Life Technologies,Paisley, united kigdom       |
| Skimmed milk 10%                                      | 100g     | Régilait, Lyon, France                         |
| Sucrose 10%                                           | 100g     | Inresa Medical, Bartenheim, France             |
| Trehalose 5%                                          | 50g      | MP biomedicals LLC illkirch ,France            |
| CaCl <sub>2</sub>                                     | 0.1g     | Inresa Medical, Bartenheim, France             |
| MgCl <sub>2</sub>                                     | 0.1g     | Inresa Medical, Bartenheim, France             |
| KOH                                                   | 0.3/0.6g | BDH LABORATORY SUPPLIES, Poole, united kingdom |
| Ascorbic acid                                         | 1g       | Inresa Medical, Bartenheim, France             |
| Uric acid                                             | 0.4g     | Sigma-Aldrich,Lyon, France                     |
| Glutathione                                           | 0.1g     | Sigma-Aldrich,Lyon, France                     |
